# Supplementary figures and images for: Aging and degradation behaviour of poly(lactic acid) composites in alcoholic and acidic food simulants
Source: Royal Society of Chemistry journal article supplement (doi:10.1039/d6ra01374k), 2026-04-22

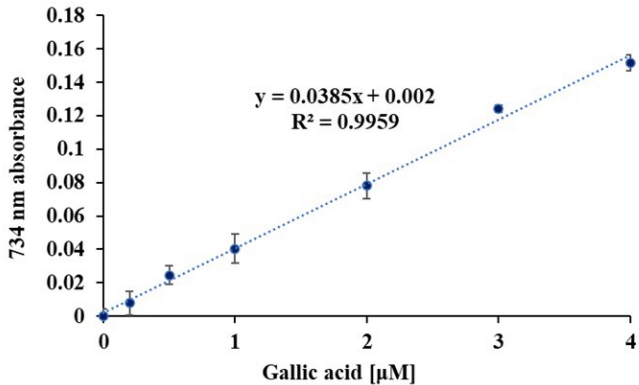

Supplement: d6ra01374k1.pdf [file d6ra01374k1.pdf]
